# Supplementary material for: In situ synthesis of multidentate PEGylated chitosan modified gold nanoparticles with good stability and biocompatibility
Source: Royal Society of Chemistry journal article supplement (doi:10.1039/c5ra11600g), 2015-01-01
Supplement: c5ra11600g1.pdf [file c5ra11600g1.pdf]

## The Supporting Information

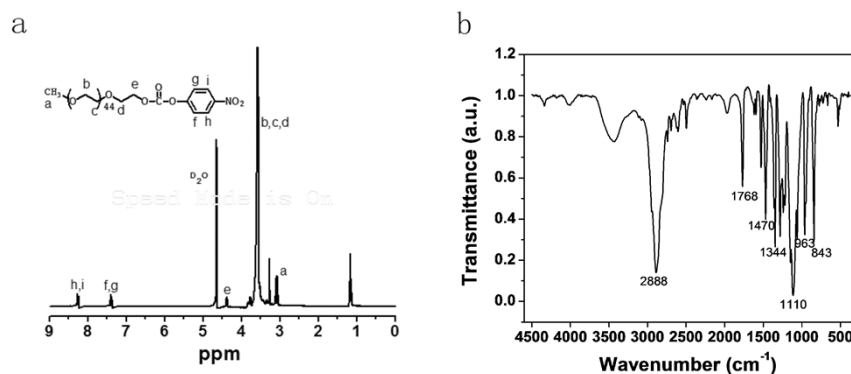

**Fig. S1** <sup>1</sup>H NMR spectra of PEG-NO<sub>2</sub> in D<sub>2</sub>O (a) and FT-IR spectra of PEG-NO<sub>2</sub>.

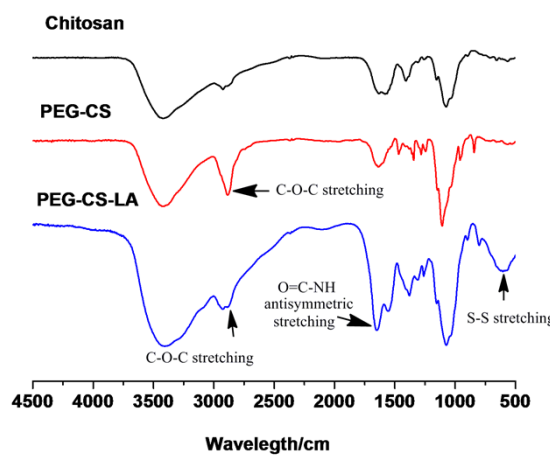

**Fig. S2** FT-IR spectra of chitosan (CS), PEG-CS and PEG-CS-LA copolymers.

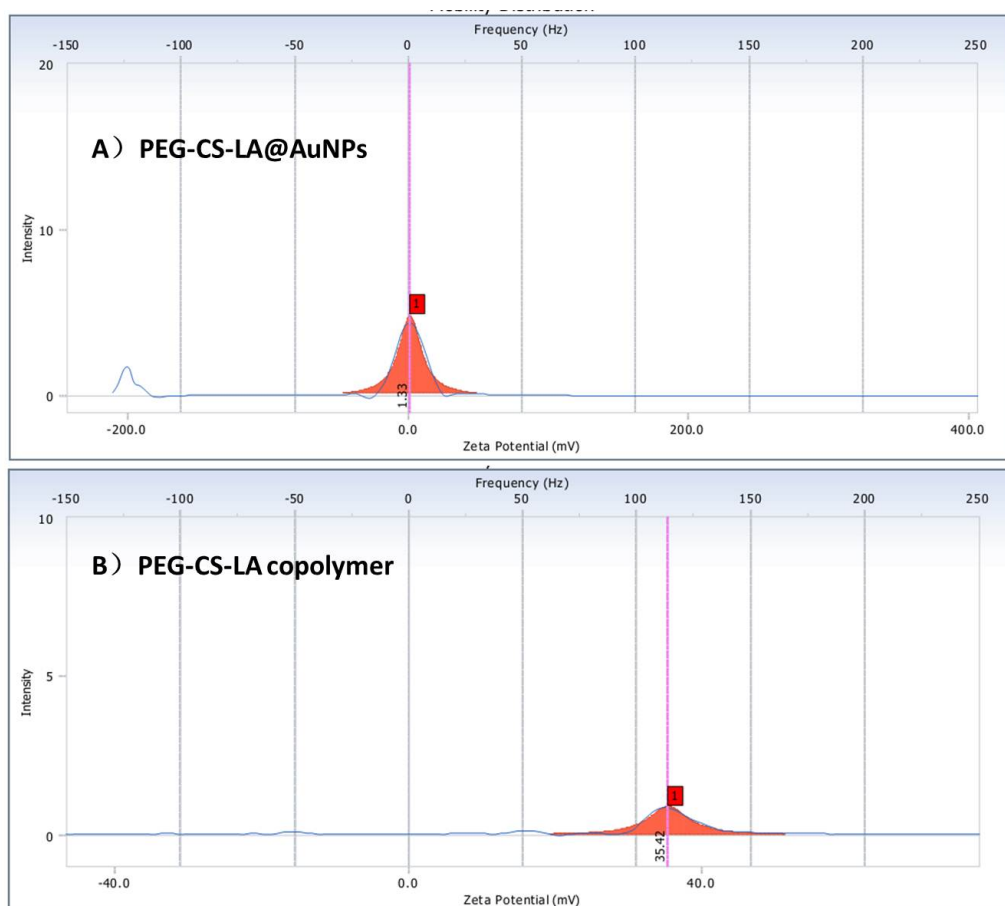

**Fig. S3** Zeta potential of PEG-CS-LA@AuNPs (A) and PEG-CS-LA copolymer (B) in water.

Table S1. Characteristics of PEG-CS, PEG-CS-LA and CS-LA copolymers

| Copolymer | SD of PEG <sup>a</sup> | SD of LA <sup>a</sup> |
|-----------|------------------------|-----------------------|
| PEG-CS    | 3%                     | -                     |
| PEG-CS-LA | 3%                     | 18%                   |
| CS-LA     | -                      | 14.8%                 |

<sup>a</sup> The substitution degree of amino groups.

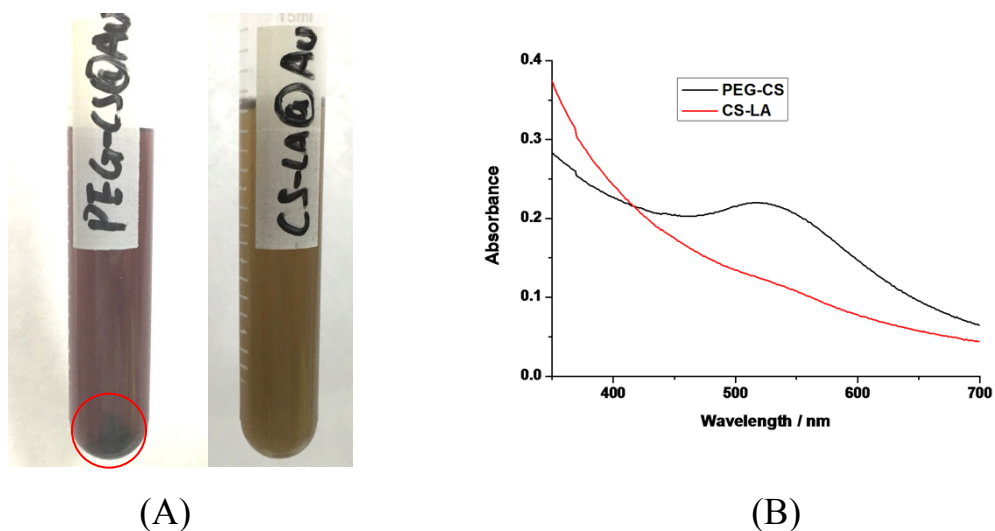

**Fig. S4** (A) Digital images of AuNPs modified by PEG-CS (left, dark red color with precipitate) and CS-LA (right, gray brown color); (B) UV-Vis spectra of PEG-CS and CS-LA modified AuNPs in water.

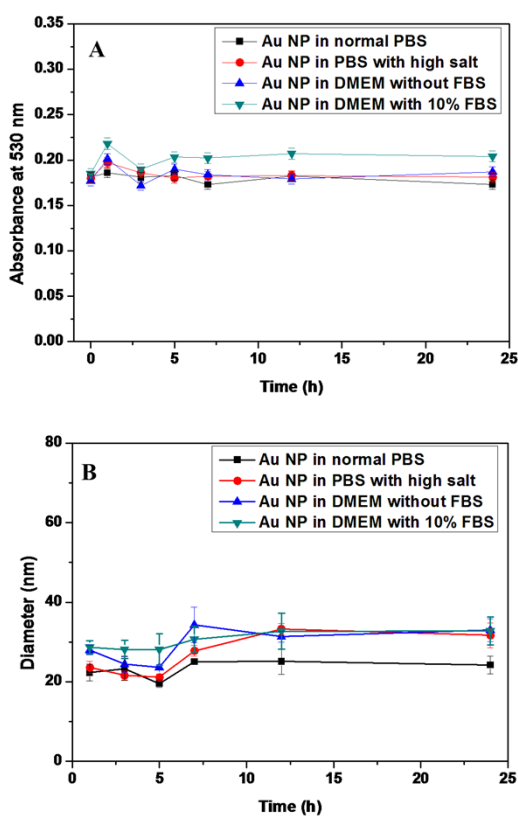

**Fig. S5** The changes of the UV absorbance of PEG-CS-LA@AuNPs at 530 nm (A) and the size of PEG-CS-LA@AuNPs during 24 hours in various medium.
